# Supplementary material
Source: Royal Society of Chemistry journal article supplement (doi:10.1039/d6ta01555g)
Supplement: d6ta01555g1.pdf [file d6ta01555g1.pdf]

## Supporting Information

### Harvesting Energy from Water Evaporation: A Green Power Device Printed from Waste Bamboo

*Chenhong Xu<sup>a</sup>, Yuanjie Wei<sup>a</sup>, Qun Liu<sup>a</sup>, Quancai Li<sup>a</sup>, Xin Guo<sup>a</sup>, Qian Wang<sup>a</sup>, Ziyi*

*Gong<sup>a</sup>, Hehe Ren<sup>a</sup>, Jian Zou<sup>a</sup>, Jing Liang<sup>a, b</sup>, Wei Wu<sup>a, b\*</sup>*

<sup>a</sup> Laboratory of Printable Functional Materials and Printed Electronics, School of  
Physics and Technology, Wuhan University, Wuhan 430072, P. R. China

<sup>b</sup> Research Center for Printed Electronics and Smart Wearable Systems, School of  
Future Technology, Wuhan Textile University, Wuhan 430200, P. R. China

#### Correspondence:

[weiwu@whu.edu.cn](mailto:weiwu@whu.edu.cn) (W. Wu)

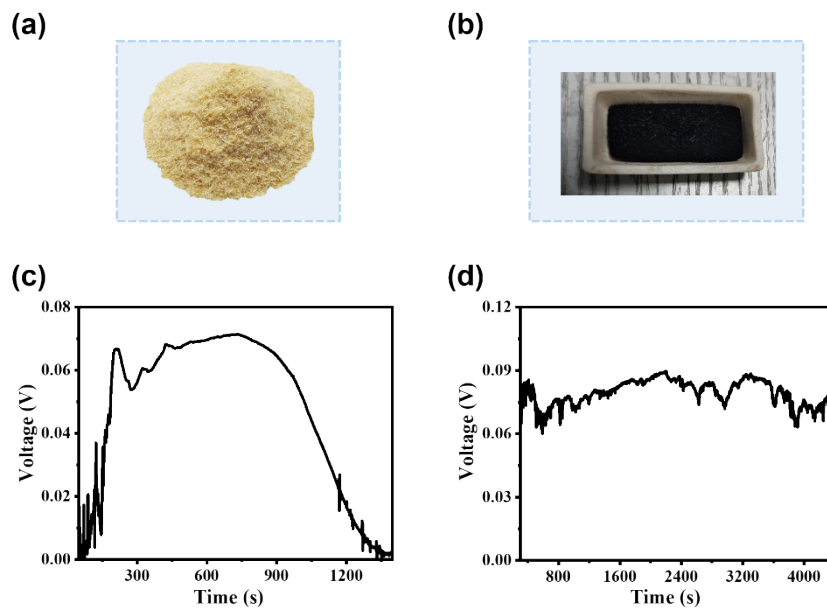

**Fig. S1** (a) Photographs showing the natural waste bamboo sawdust and (b) the resulting bamboo-derived carbon after high-temperature treatment. (c) Variation in open-circuit voltage during the drying process under ambient conditions after water is added to a doctor-bladed film prepared from an aqueous dispersion of bamboo-derived carbon. (d) Change in open-circuit voltage when a section of the doctor-bladed film is partially immersed in water.

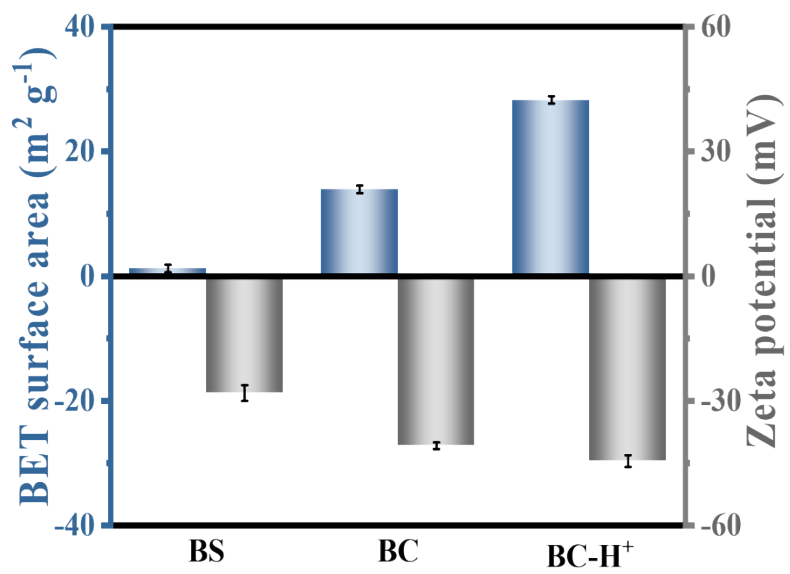

**Fig. S2** Comparative analysis of BET surface area and zeta potential for BS, BC, and BC-H<sup>+</sup>.

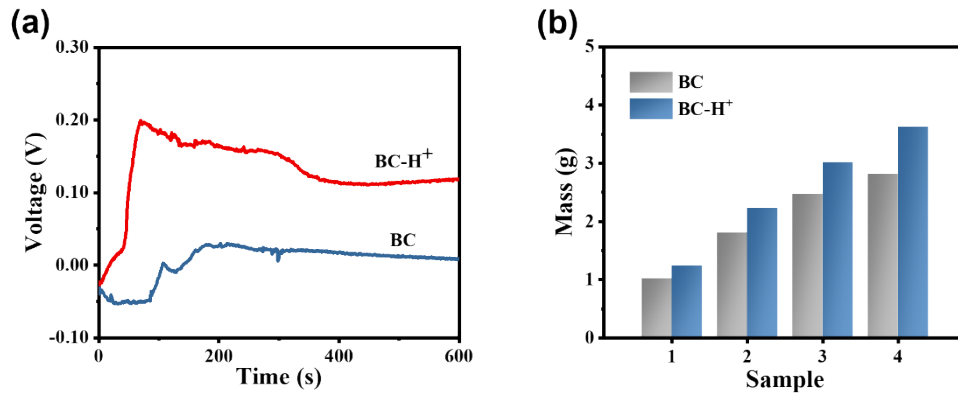

**Fig. S3** Effects of acidification treatment on bamboo-derived charcoal. (a) Alterations in evaporation-induced power generation performance before and after acidification. (b) Changes in mass of the charcoal material following the acidification process.

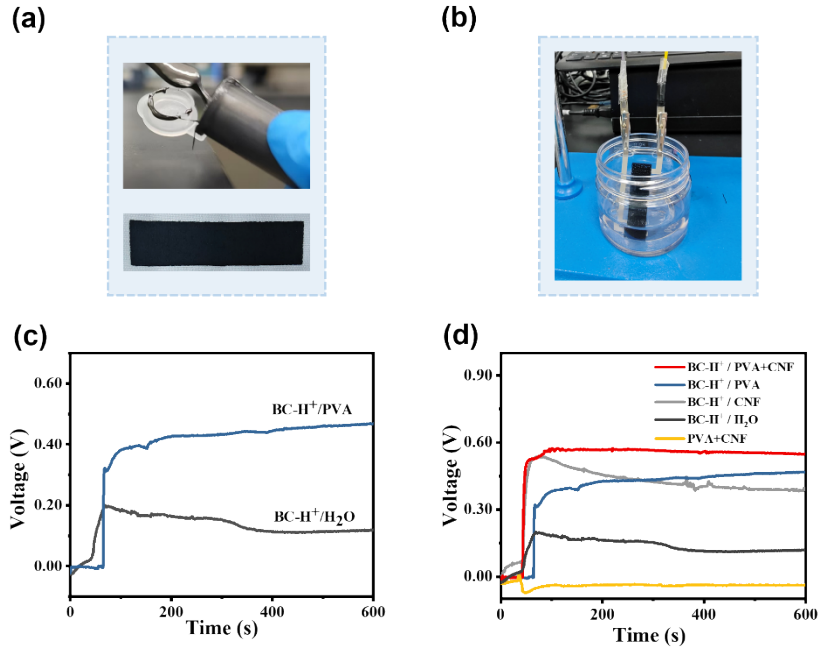

**Fig. S4** Performance evolution of BC-H<sup>+</sup> formulated into functional ink. (a) Photograph depicting the BC-H<sup>+</sup> ink prepared for printing applications. (b) Devices fabricated *via* screen-printing using the BC-H<sup>+</sup> ink. (c) Open-circuit voltage comparison between an aqueous BC-H<sup>+</sup> solution and the formulated BC-H<sup>+</sup> ink. (d) Open-circuit voltage of BC-H<sup>+</sup> inks prepared with varying binder compositions.

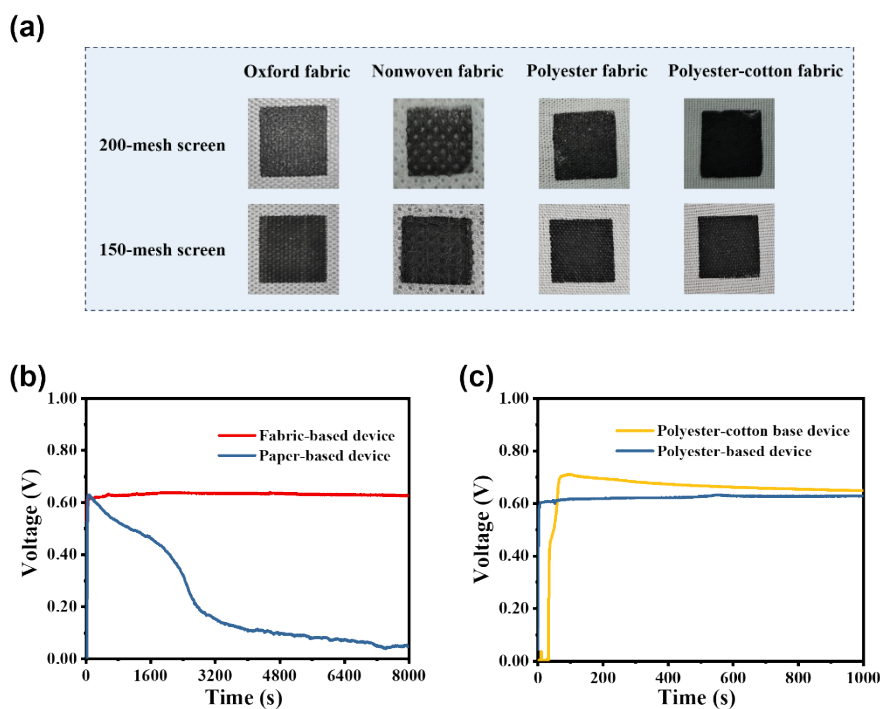

**Fig. S5** Impact of different printing substrates on BC-H<sup>+</sup> devices. (a) Photographs showing BC-H<sup>+</sup> ink patterns fabricated using 150-mesh and 200-mesh screens on different textile materials. (b) Open-circuit voltage recorded from BC-H<sup>+</sup> films deposited on fabric-based and paper-based substrates. (c) Open-circuit voltage of BC-H<sup>+</sup> films prepared on nylon and polyester textile substrates.

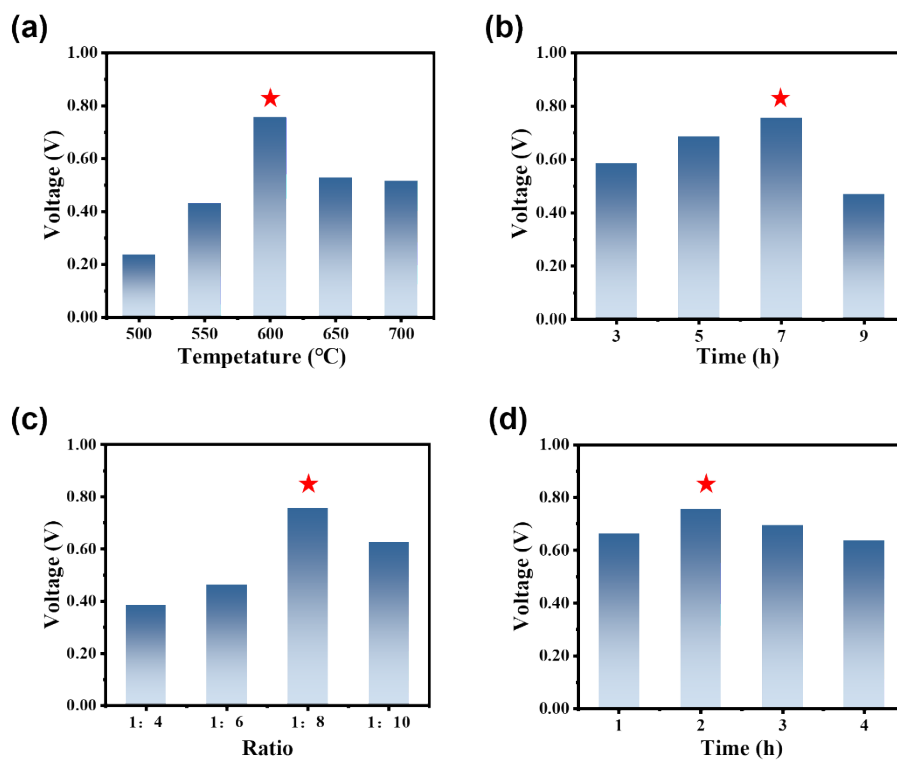

**Fig. S6** The power generation performance of BC-H<sup>+</sup> membranes through evaporation is influenced by carbonization and acidification processes. (a) Open-circuit voltage of BC-H<sup>+</sup> membranes fabricated at varying carbonization temperatures. (b) Open-circuit voltage of BC-H<sup>+</sup> membranes prepared with different carbonization durations. (c) Open-circuit voltage of BC-H<sup>+</sup> membranes subjected to varying acidification ratios. (d) Open-circuit voltage of BC-H<sup>+</sup> membranes treated with different acidification times.

(a)

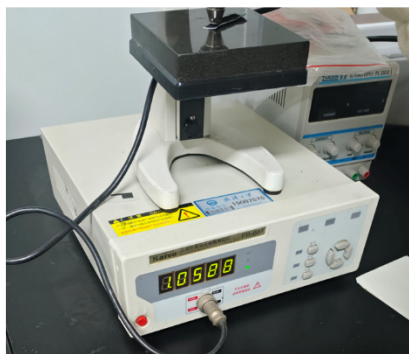

(b)

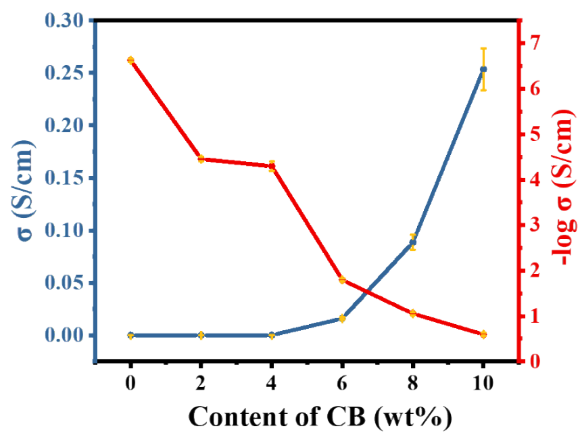

**Fig. S7** Electrical conductivity of composite membranes under different CB contents.

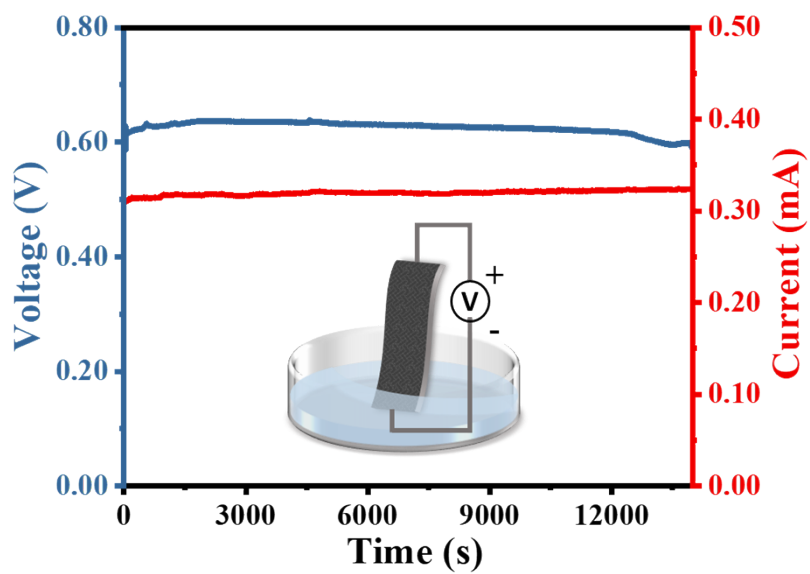

**Fig. S8** Open-circuit voltage (left) and short-circuit current (right) of the optimized device in deionized water.

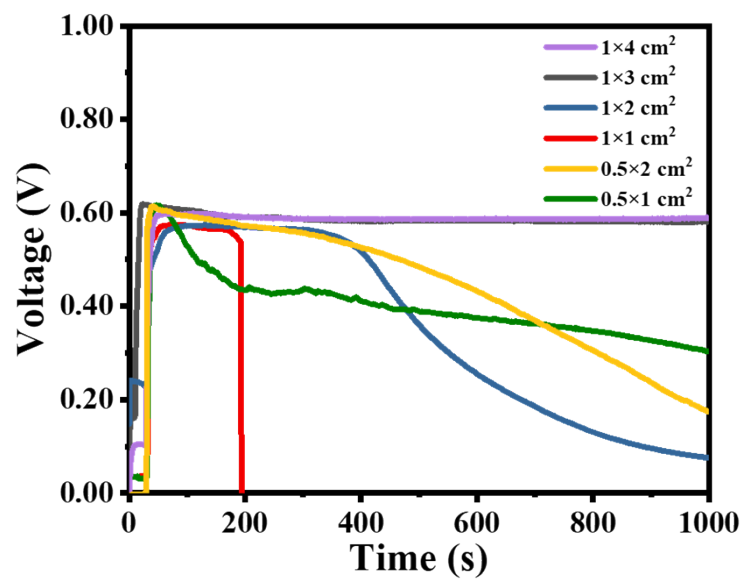

**Fig. S9** The temporal evolution of open-circuit voltage for BC-H<sup>+</sup> membranes with varying active areas.

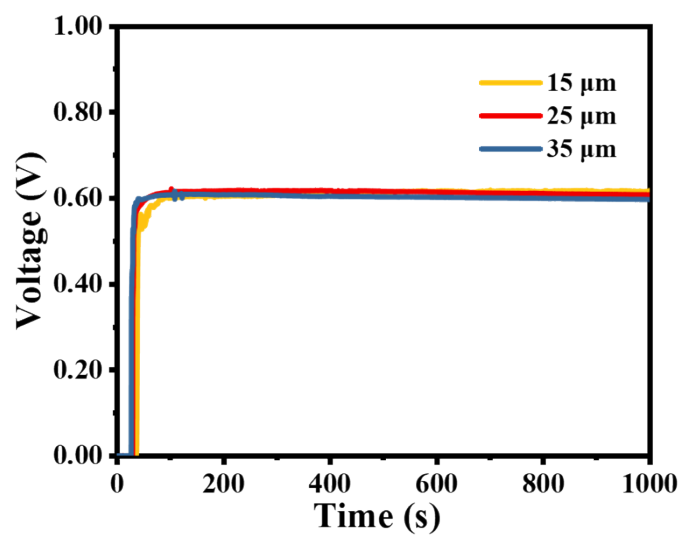

**Fig. S10** The open-circuit voltage variations of proton exchange membranes with different thicknesses.

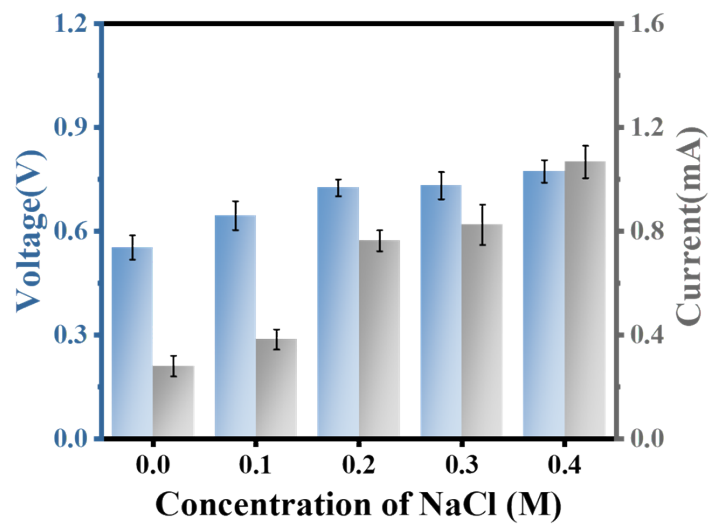

**Fig. S11** Variations in voltage and current of the device measured in NaCl solutions with concentrations ranging from 0 to 0.4 M.

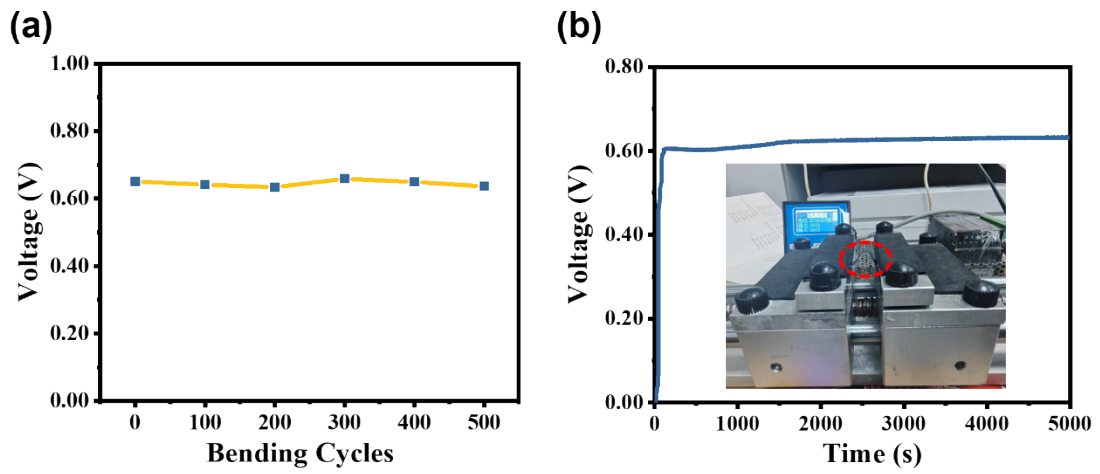

**Fig. S12** (a) Output voltage of the device under different bending cycle times. (b) The variation of the output voltage of the device over time after 500 cycles of bending.

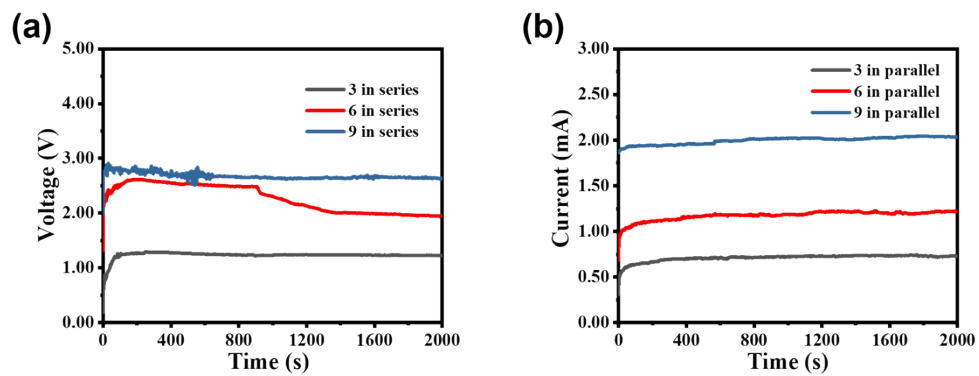

**Fig. S13** The effects of series or parallel connections on voltage and current with varying numbers of devices.
